# Supplementary material for: Enhanced deep-red emission from Mn4+/Mg2+co-doped CaGdAlO4phosphors for plant cultivation
Source: Royal Society of Chemistry journal article supplement (doi:10.1039/c8dt04955f), 2019-01-01
Supplement: c8dt04955f1.pdf [file c8dt04955f1.pdf]

# Enhanced deep-red emission from Mn<sup>4+</sup>/Mg<sup>2+</sup> co-doped CaGdAlO<sub>4</sub> phosphors for plant cultivation

Jianxu Hu,<sup>a,\*</sup> Tinghong Huang,<sup>b,\*</sup> Yuanpeng Zhang,<sup>c</sup> Bin Lu,<sup>a</sup> Huanqing Ye,<sup>d</sup> Baojiu Chen,<sup>e</sup> Haiping Xia,<sup>a</sup> Changyan Ji,<sup>f,\*</sup>

## Supporting information

### Contents

Fig. S1 (a)-(d) XRD Rietveld refinement results for *x* mol% Mn<sup>4+</sup>/Mg<sup>2+</sup> co-doped CaGdAlO<sub>4</sub> phosphors (*x* = 0.2, 1, 1.5, 2).

Fig. S2 (a) Diffuse reflection spectra of undoped CaGdAlO<sub>4</sub> phosphor. (b) The dependence of  $[F(R_{\infty})hv]^{1/2}$  on the photon energy *hν*.

Fig. S3 (a) FWHM dependent plot on Mn<sup>4+</sup>/Mg<sup>2+</sup> doping concentration. (b) CIE chromaticity coordinates (*x*, *y*) as a function of Mn<sup>4+</sup>/Mg<sup>2+</sup> doping concentration.

Fig. S4 (a)-(e) A comparison of red emission from Mn<sup>4+</sup> ions with and without Mg<sup>2+</sup> ions in CaGdAlO<sub>4</sub> host.

Fig. S5 (a)-(e) A comparison of decay time at 712 nm in the presence and absence of Mg<sup>2+</sup> ions in CaGdAlO<sub>4</sub> host.

Fig. S6 Excitation spectra of BaSO<sub>4</sub> (in blue) and the emission spectra of 0.5 mol% Mn<sup>4+</sup> singly doped (in green) and 0.5 mol% Mn<sup>4+</sup>/Mg<sup>2+</sup> co-doped (in red) phosphors under 335 nm excitation collected by an integrating sphere.

Fig. S7 Raman spectra of un-doped CaGdAlO<sub>4</sub> host.

Table S1 Crystallographic data of *x* mol% Mn<sup>4+</sup>/Mg<sup>2+</sup> co-doped CaGdAlO<sub>4</sub> phosphors (*x* = 0.2, 0.5, 1, 1.5, and 2) from Rietveld refinement.

Table S2 Emission peaks and quantum efficiency for reported Mn<sup>4+</sup> doped phosphors.

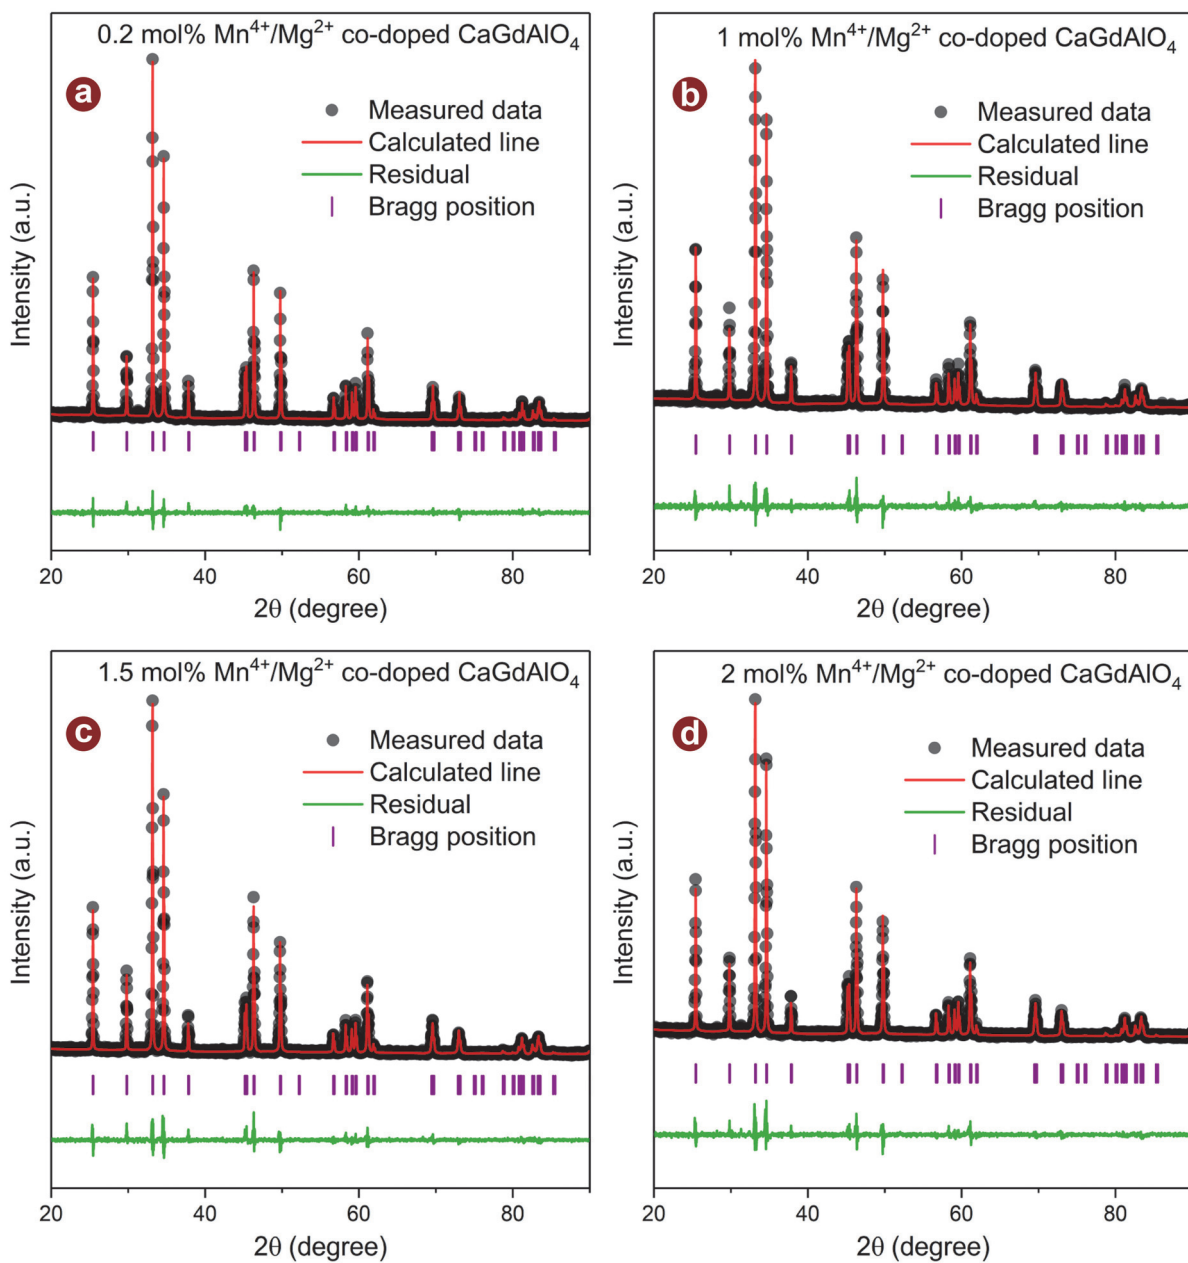

Fig. S1 (a)-(d) XRD Rietveld refinement results for  $x$  mol%  $\text{Mn}^{4+}/\text{Mg}^{2+}$  co-doped  $\text{CaGdAlO}_4$  phosphors ( $x = 0.2, 1, 1.5, 2$ ).

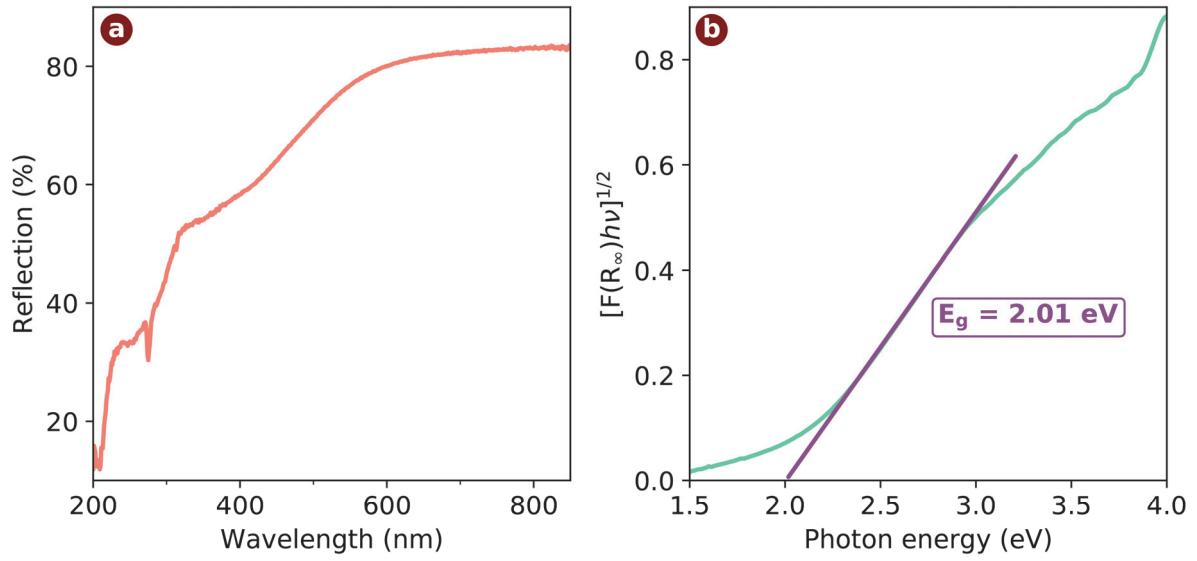

Fig. S2 (a) Diffuse reflection spectra of undoped CaGdAlO<sub>4</sub> phosphor. (b) The dependence of  $[F(R_{\infty})hv]^{1/2}$  on the photon energy  $hv$ .

The energy gap ( $E_g$ ) of CaGdAlO<sub>4</sub> can be evaluated by the following equation:

$$[F(R_{\infty})hv]^n = A(hv - E_g) \quad (1)$$

where  $hv$  denotes photon energy,  $A$  is a proportional constant,  $n$  equals to 1/2 for an indirect allowed transition.  $F(R_{\infty})$  is the Kubelka-Munk function, which can be expressed as:

$$[F(R_{\infty})] = (1 - R)^2/2R$$

where  $R$  is the reflection coefficient.  $[F(R_{\infty})hv]^{1/2}$  is plotted against  $hv$  according to Taus method, from which the energy gap is determined to be 2.01 eV.

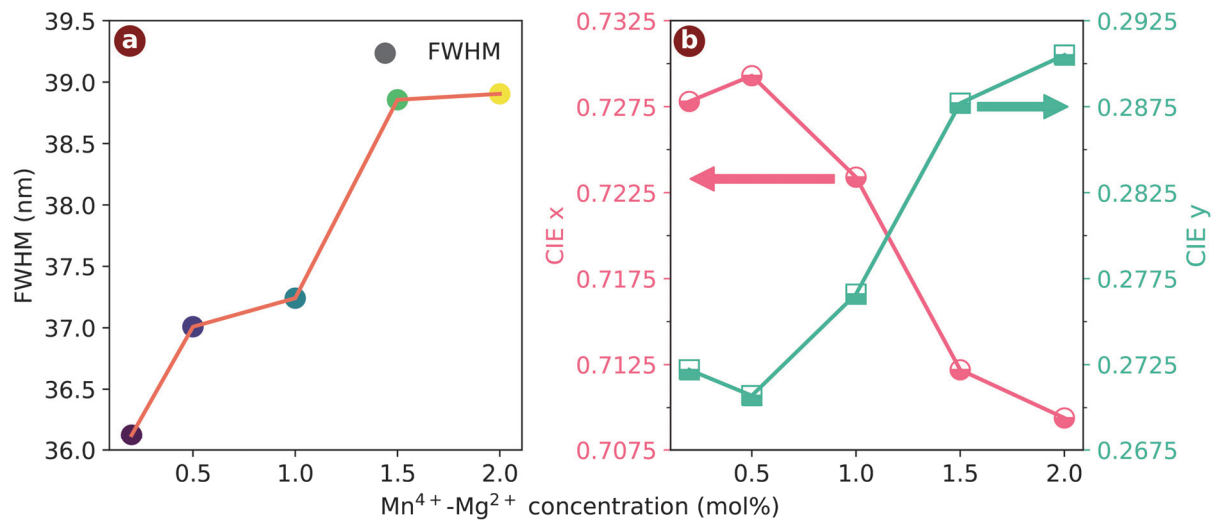

Fig. S3 (a) FWHM dependent plot on Mn<sup>4+</sup>/Mg<sup>2+</sup> doping concentration. (b) CIE chromaticity coordinates (x, y) as a function of Mn<sup>4+</sup>/Mg<sup>2+</sup> doping concentration.

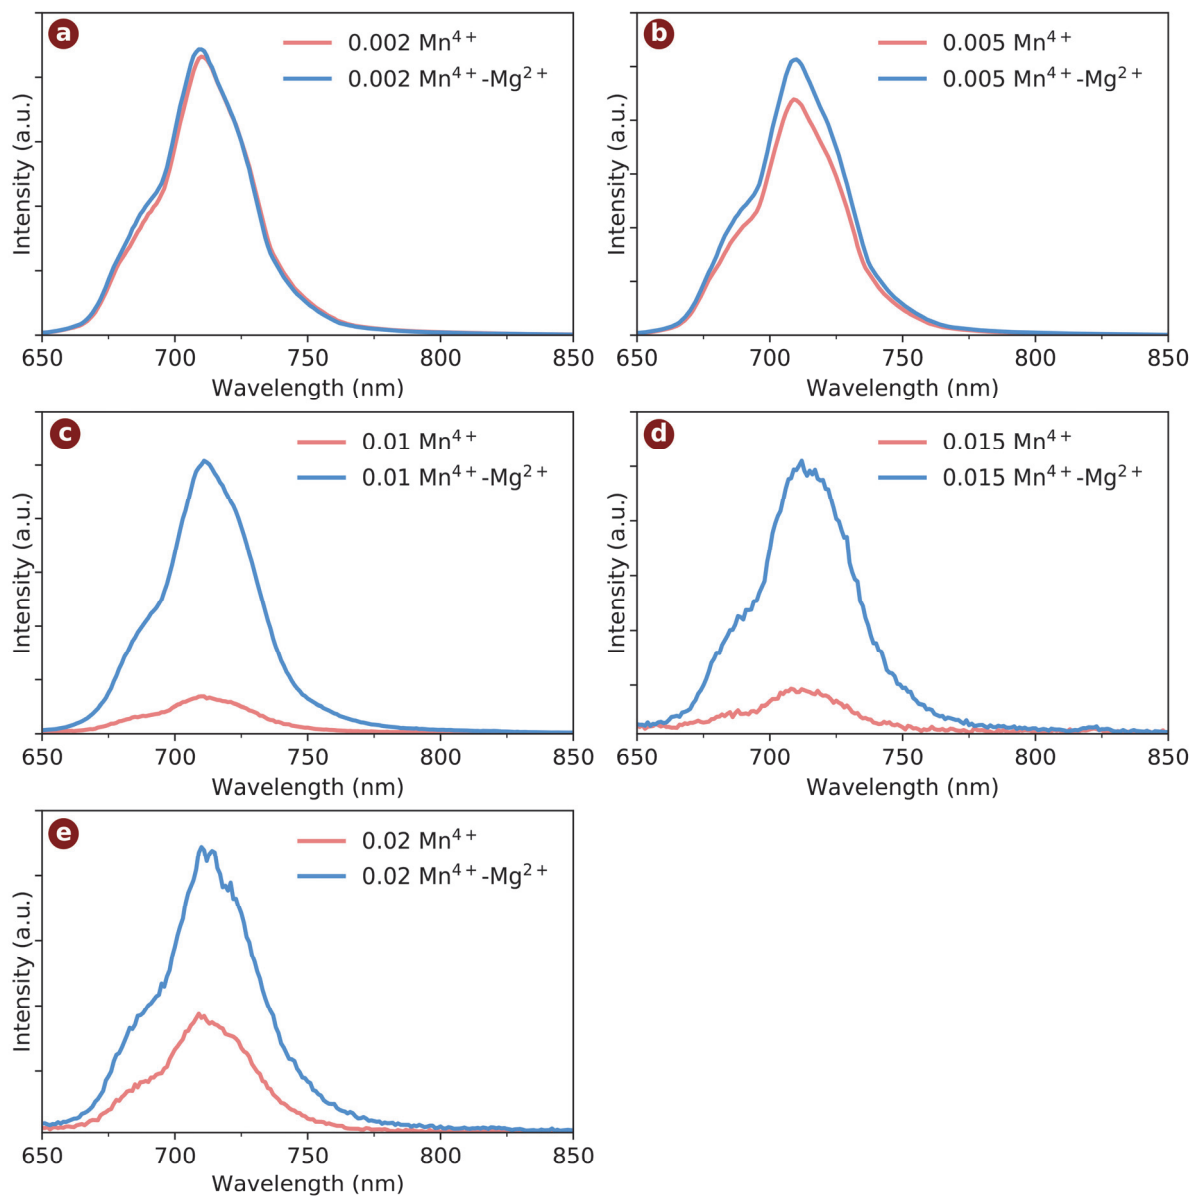

Fig. S4 (a)-(e) A comparison of red emission from  $\text{Mn}^{4+}$  ions with and without  $\text{Mg}^{2+}$  ions in  $\text{CaGdAlO}_4$  host.

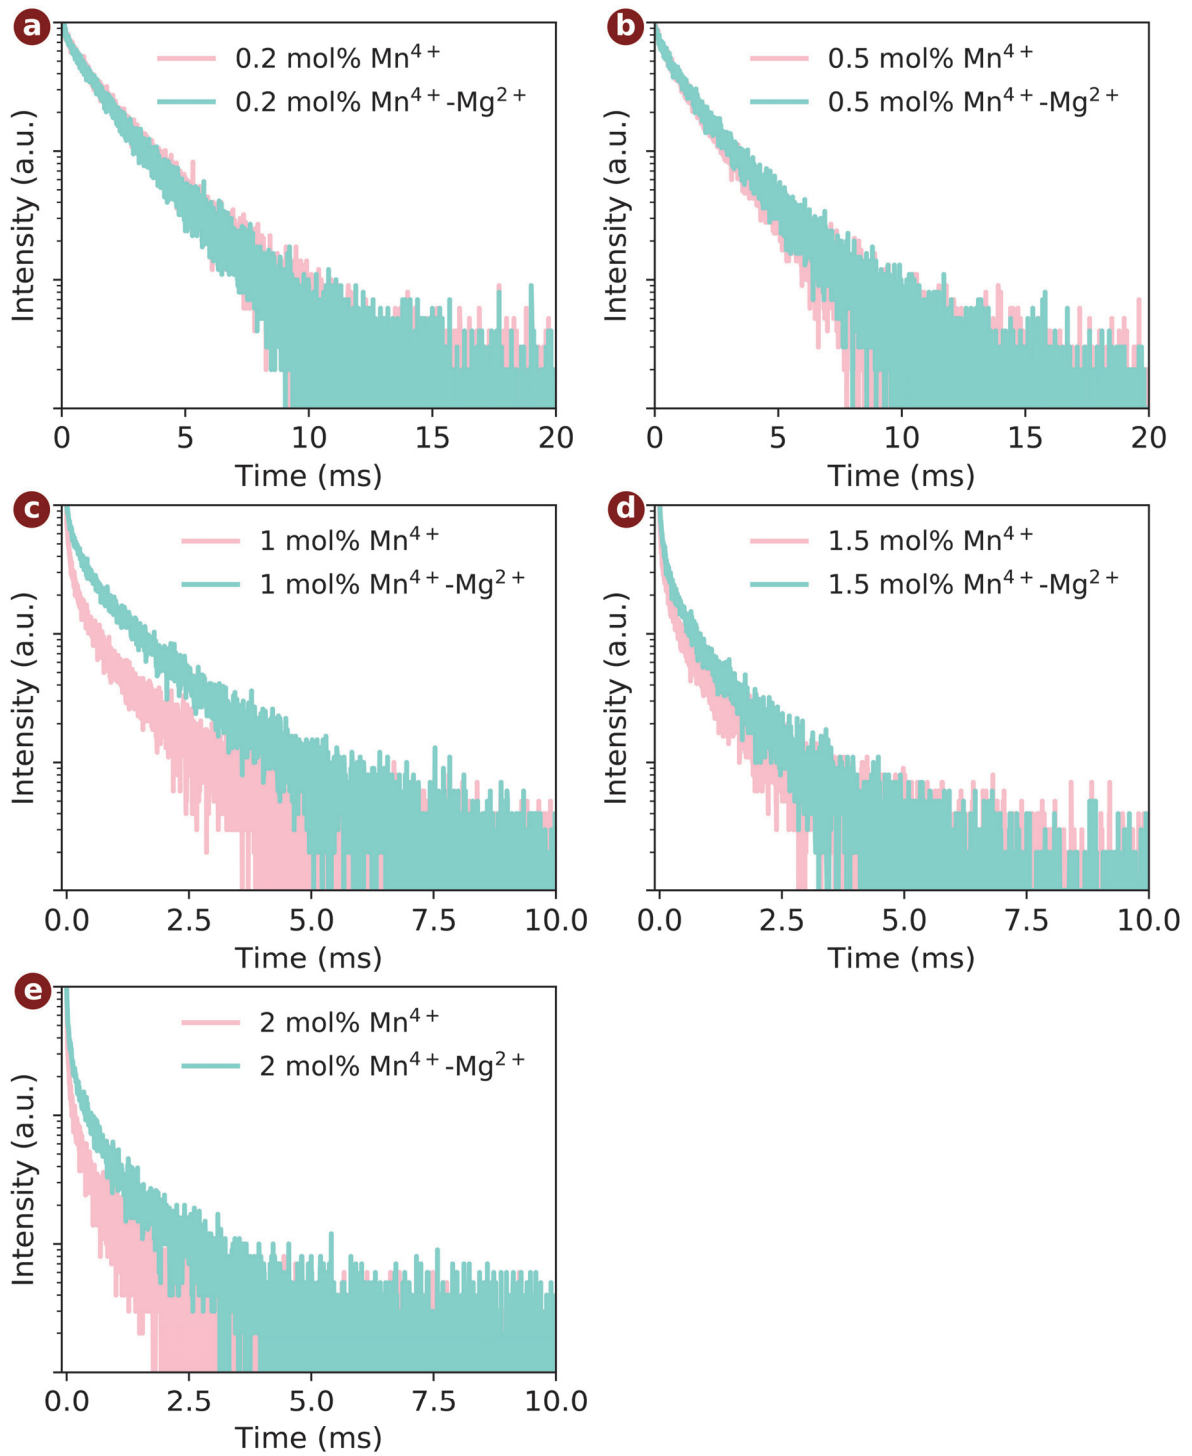

Fig. S5 (a)-(e) A comparison of decay time at 712 nm in the presence and absence of Mg<sup>2+</sup> ions in CaGdAlO<sub>4</sub> host.

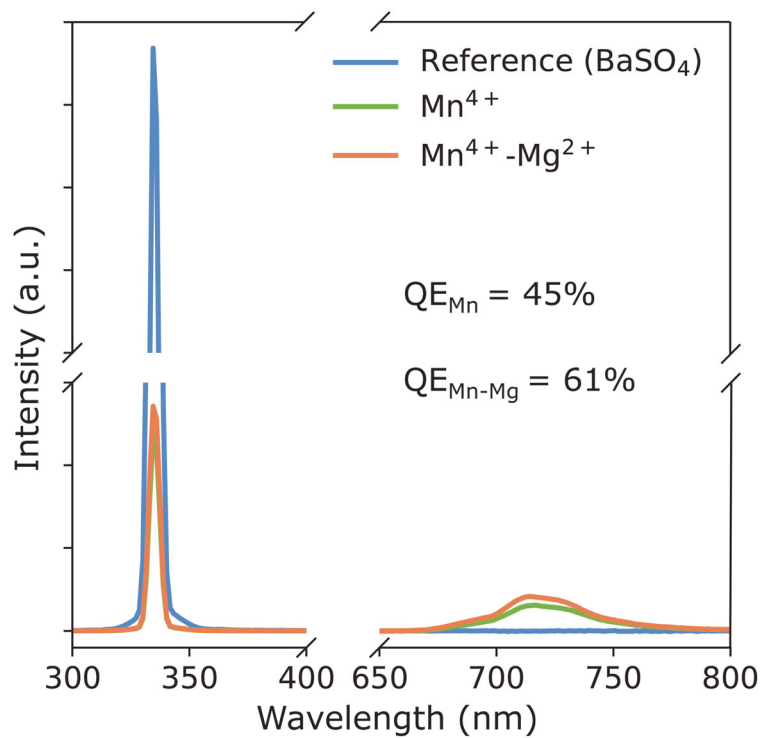

Fig. S6 Excitation spectra of BaSO<sub>4</sub> (in blue) and the emission spectra of 0.5 mol% Mn<sup>4+</sup> singly doped (in green) and 0.5 mol% Mn<sup>4+</sup>/Mg<sup>2+</sup> co-doped (in red) phosphors under 335 nm excitation collected by an integrating sphere.

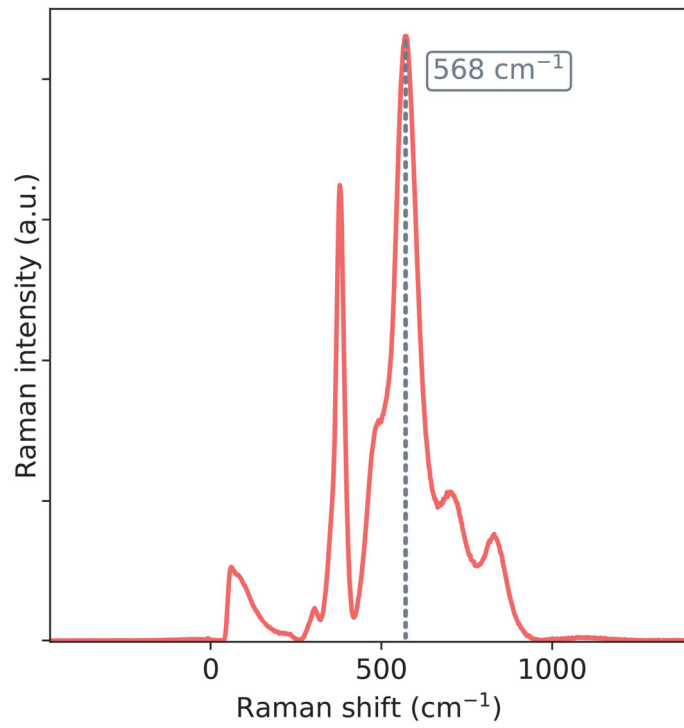

Fig. S7 Raman spectra of un-doped CaGdAlO<sub>4</sub> host.



Table S1 Crystallographic data of  $x$  mol%  $\text{Mn}^{4+}/\text{Mg}^{2+}$  co-doped  $\text{CaGdAlO}_4$  phosphors ( $x = 0.2, 0.5, 1, 1.5, \text{ and } 2$ ) from Rietveld refinement.

| Sample                | 0.2%<br>$\text{Mn}^{4+}/\text{Mg}^{2+}$ | 0.5%<br>$\text{Mn}^{4+}/\text{Mg}^{2+}$ | 1%<br>$\text{Mn}^{4+}/\text{Mg}^{2+}$ | 1.5%<br>$\text{Mn}^{4+}/\text{Mg}^{2+}$ | 2%<br>$\text{Mn}^{4+}/\text{Mg}^{2+}$ |
|-----------------------|-----------------------------------------|-----------------------------------------|---------------------------------------|-----------------------------------------|---------------------------------------|
| Crystal system        | Tetragonal                              | Tetragonal                              | Tetragonal                            | Tetragonal                              | Tetragonal                            |
| Space group           | <i>I4/mmm</i>                           | <i>I4/mmm</i>                           | <i>I4/mmm</i>                         | <i>I4/mmm</i>                           | <i>I4/mmm</i>                         |
| $a$ (Å)               | 3.6613                                  | 3.6624                                  | 3.6637                                | 3.6642                                  | 3.6657                                |
| $b$ (Å)               | 3.6613                                  | 3.6624                                  | 3.6637                                | 3.6642                                  | 3.6657                                |
| $c$ (Å)               | 11.9890                                 | 11.9858                                 | 11.9857                               | 11.9891                                 | 11.9916                               |
| $V$ (Å <sup>3</sup> ) | 160.71                                  | 160.76                                  | 160.88                                | 160.97                                  | 161.13                                |
| $\alpha$ (deg)        | 90                                      | 90                                      | 90                                    | 90                                      | 90                                    |
| $\beta$ (deg)         | 90                                      | 90                                      | 90                                    | 90                                      | 90                                    |
| $\gamma$ (deg)        | 90                                      | 90                                      | 90                                    | 90                                      | 90                                    |
| $\chi^2$              | 2.85                                    | 2.51                                    | 2.03                                  | 2.27                                    | 2.33                                  |
| $R_p$ (%)             | 4.74                                    | 4.41                                    | 4.31                                  | 4.39                                    | 4.66                                  |
| $R_{wp}$ (%)          | 5.93                                    | 5.76                                    | 5.79                                  | 5.85                                    | 5.91                                  |

Table S2 Emission peaks and quantum efficiency for reported Mn<sup>4+</sup> doped phosphors.

| Phosphors                                        | Peak wavelength (nm) | Quantum efficiency (%) | Reference |
|--------------------------------------------------|----------------------|------------------------|-----------|
| La(MgTi) <sub>1/2</sub> O <sub>3</sub>           | 708                  | 27.2                   | 12        |
| Gd <sub>2</sub> ZnTiO <sub>6</sub>               | 705                  | 39.7                   | 54        |
| Ba <sub>2</sub> TiGe <sub>2</sub> O <sub>8</sub> | 666                  | 35.6                   | 55        |
| Li <sub>2</sub> Mg <sub>3</sub> SnO <sub>6</sub> | 670                  | 36.3                   | 56        |
| La <sub>2</sub> MgTiO <sub>6</sub>               | 710                  | 58.7                   | 57        |
| NaMgLaTeO <sub>6</sub>                           | 703                  | 57.4                   | 40        |
| Sr <sub>3</sub> NaSbO <sub>6</sub>               | 695                  | 56.2                   | 58        |
| Ca <sub>2</sub> LaSbO <sub>6</sub>               | 685                  | 52.2                   | 59        |
| BaLaMgNbO <sub>6</sub>                           | 700                  | 52.0                   | 60        |
| CaGdAlO <sub>4</sub>                             | 712                  | 61.0                   | This work |
